# Supplementary material for: Comparative genomics of Rothia species reveals diversity in novel biosynthetic gene clusters and ecological adaptation to different eukaryotic hosts and host niches
Source: PubMed Central journal article supplement — Microb Genom. 2022 Sep 27;8(9):mgen000854. doi: 10.1099/mgen.0.000854 (PMC9676035; doi:10.1099/mgen.0.000854), 2022-09-27
Supplement: mgen-8-854-s002.pdf [file mgen-8-854-s002.pdf]

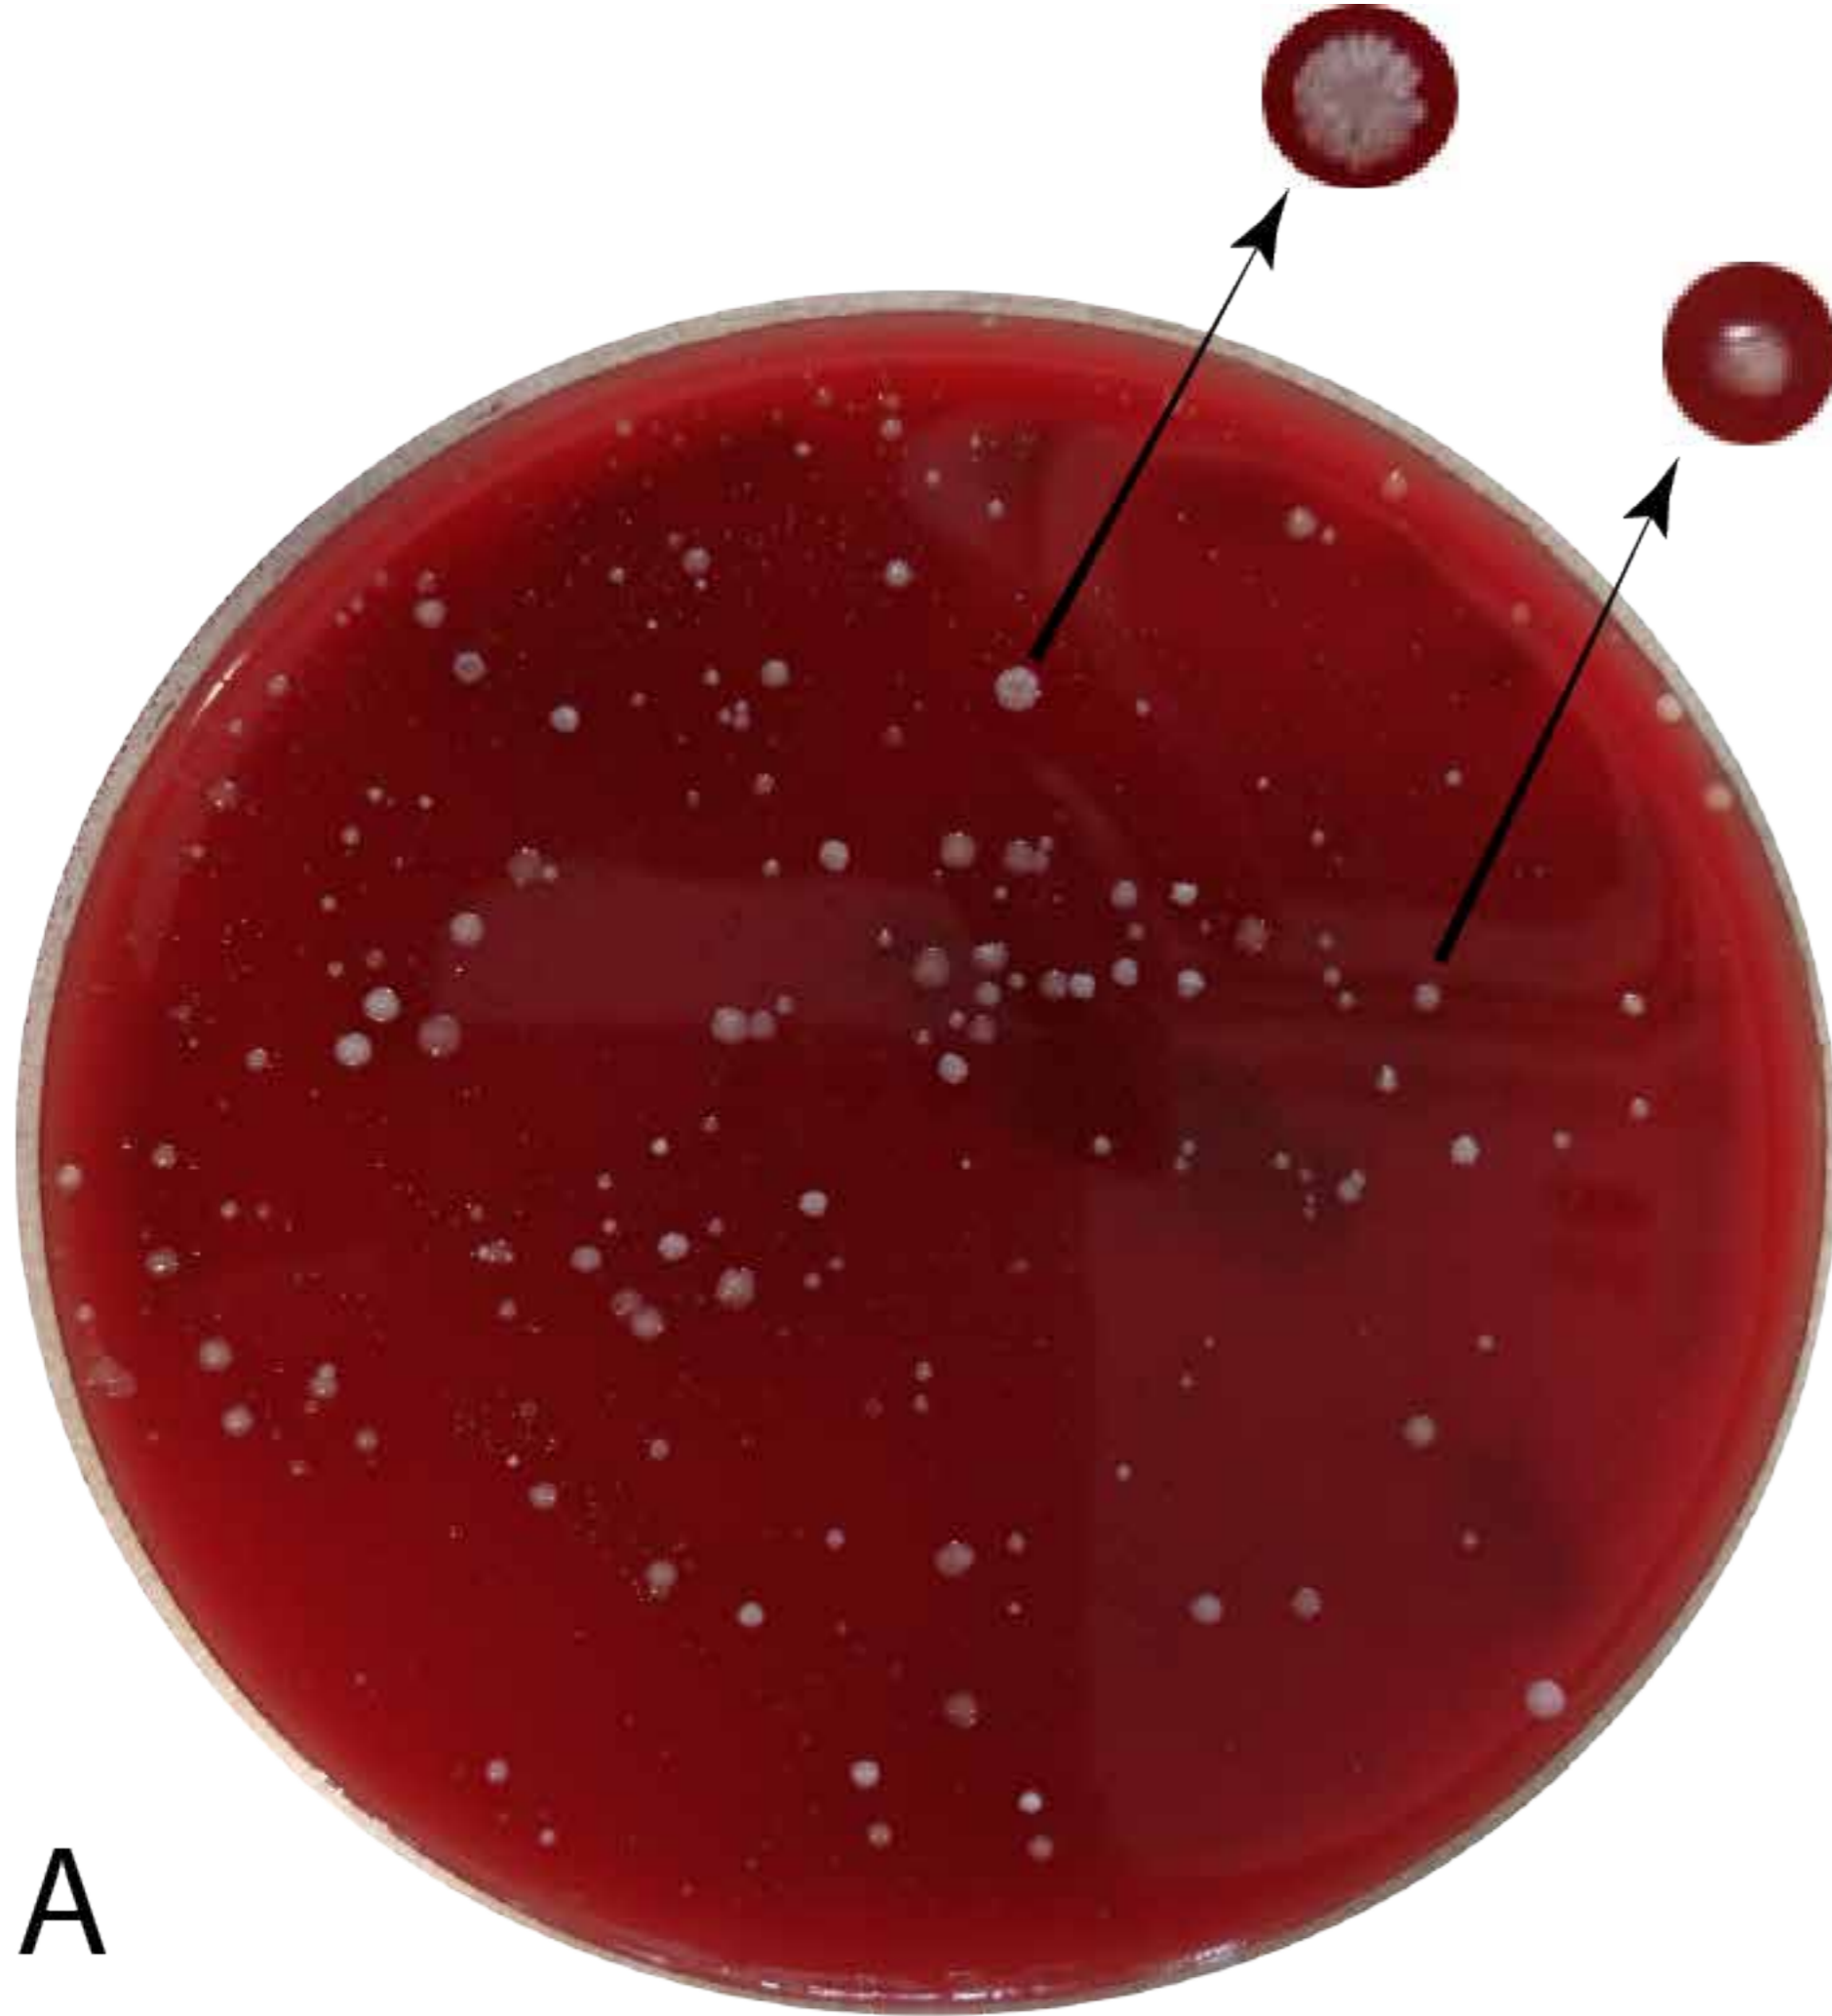

B

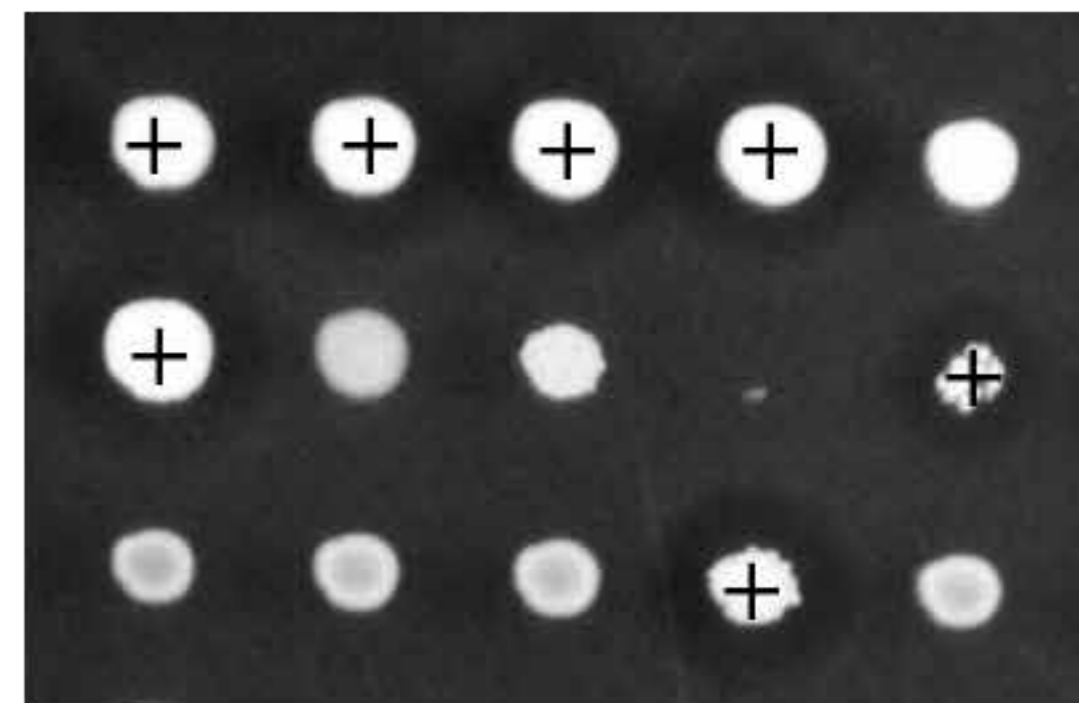

C

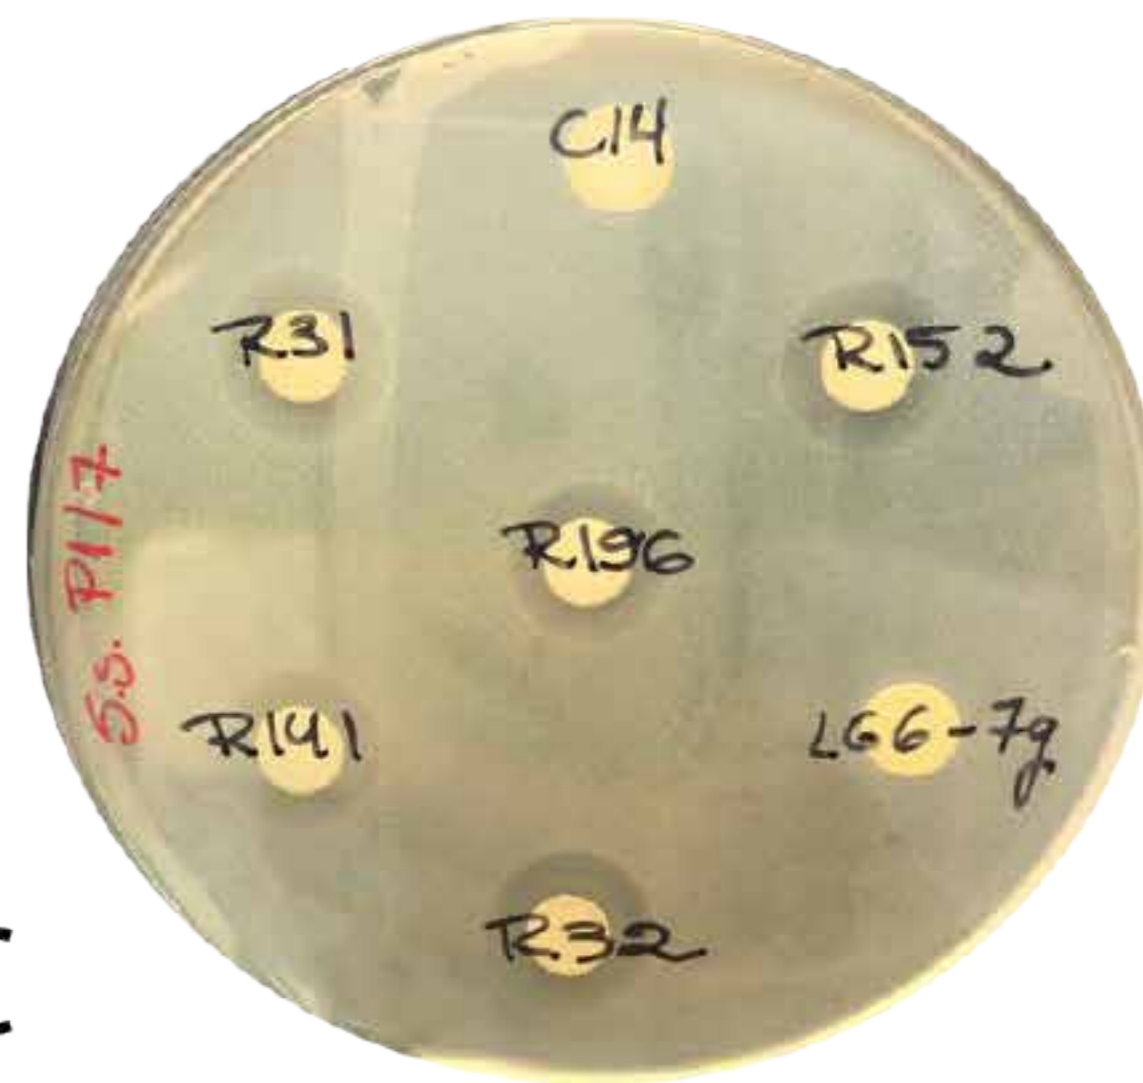

**Supplementary Figure 1.** A) Columbia agar plate containing bacterial colonies; insert showing two *Rothia* colonies selected on basis of colony morphology, B and C) Screening overlay inhibition assays on agar plates to identify colonies inhibiting growth of target bacteria in the overlay and inhibition zones ("halos") where the growth of target bacteria is inhibited by products secreted by candidate antagonist.
